# Supplementary material for: Kinematic Behavior of an Untethered, Small-Scale Hydrogel-Based Soft Robot in Response to Magneto-Thermal Stimuli
Source: MDPI journal article supplement (doi:10.3390/biomimetics8040379), 2023-08-19
Supplement: s1 [file s1]

## Supplementary materials

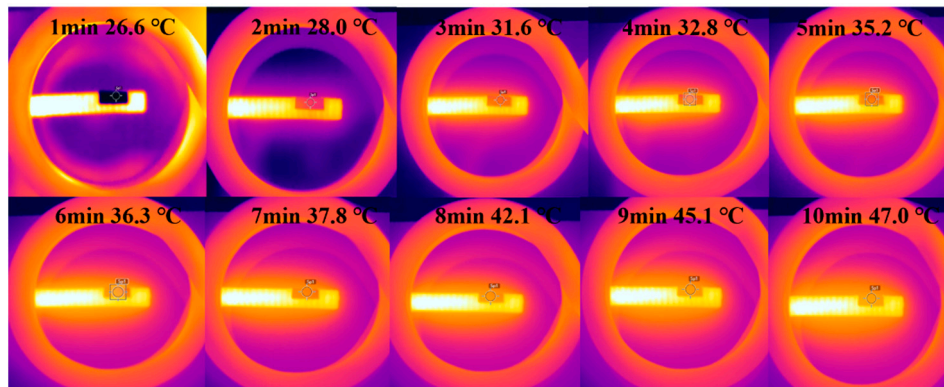

Figure S1. Infrared image of a gastropod-free soft robot walking on a gastropod microstructure.

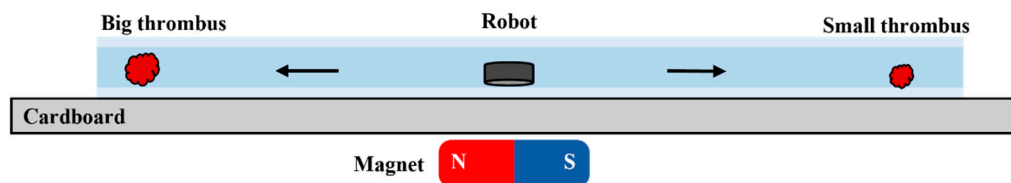

Figure S2. Schematic diagram of magnetic navigation motion platform.

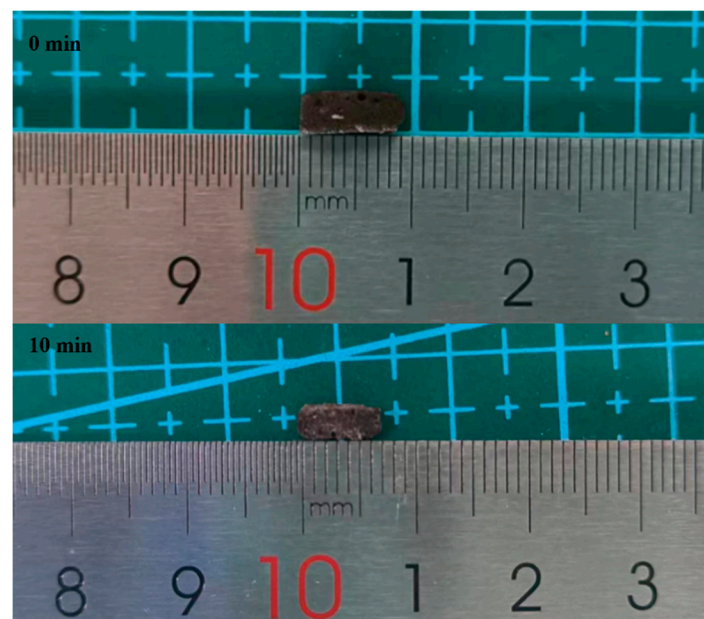

Figure S3. Size change of the robot under 28-A induced current.
